# Supplementary material for: Influence of modifications (from AoB2015 to v0.5) in the Vegetation Optimality Model
Source: Copernicus journal article supplement (doi:10.5194/gmd-15-883-2022), 2022-02-01
Supplement: Supplementary file 1 [file gmd-15-883-2022-supplement.zip]

Archive with 6 entries (6 files):
- gmd-15-883-2022-supplement-title-page.pdf
- S1_comp2015.pdf
- S2_delz_sens.pdf
- S3_weatherdata.pdf
- S4_weather_towerdata.pdf
- S5_sens_rootpar.pdf
