# Supplementary material for: Influence of modifications (from AoB2015 to v0.5) in the Vegetation Optimality Model
Source: Copernicus journal article supplement (doi:10.5194/gmd-15-883-2022), 2022-02-01
Supplement: Supplementary file 1 [file gmd-15-883-2022-supplement.zip › gmd-15-883-2022-supplement-title-page.pdf]

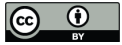

*Supplement of*

## **Influence of modifications (from AoB2015 to v0.5) in the Vegetation Optimality Model**

**Remko C. Nijzink et al.**

*Correspondence to:* Remko C. Nijzink ([remko.nijzink@list.lu](mailto:remko.nijzink@list.lu))

- [gmd-15-883-2022-supplement-title-page.pdf](#)
- [S1\\_comp2015.pdf](#)
- [S2\\_delz\\_sens.pdf](#)
- [S3\\_weatherdata.pdf](#)
- [S4\\_weather\\_towerdata.pdf](#)
- [S5\\_sens\\_rootpar.pdf](#)

The copyright of individual parts of the supplement might differ from the article licence.
