# Supplementary material for: Influence of modifications (from AoB2015 to v0.5) in the Vegetation Optimality Model
Source: Copernicus journal article supplement (doi:10.5194/gmd-15-883-2022), 2022-02-01
Supplement: Supplementary file 1 [file gmd-15-883-2022-supplement.zip › S3_weatherdata.pdf]

# Supplement S3

December 15, 2021

## 1 Weatherdata

### 1.1 Timeseries

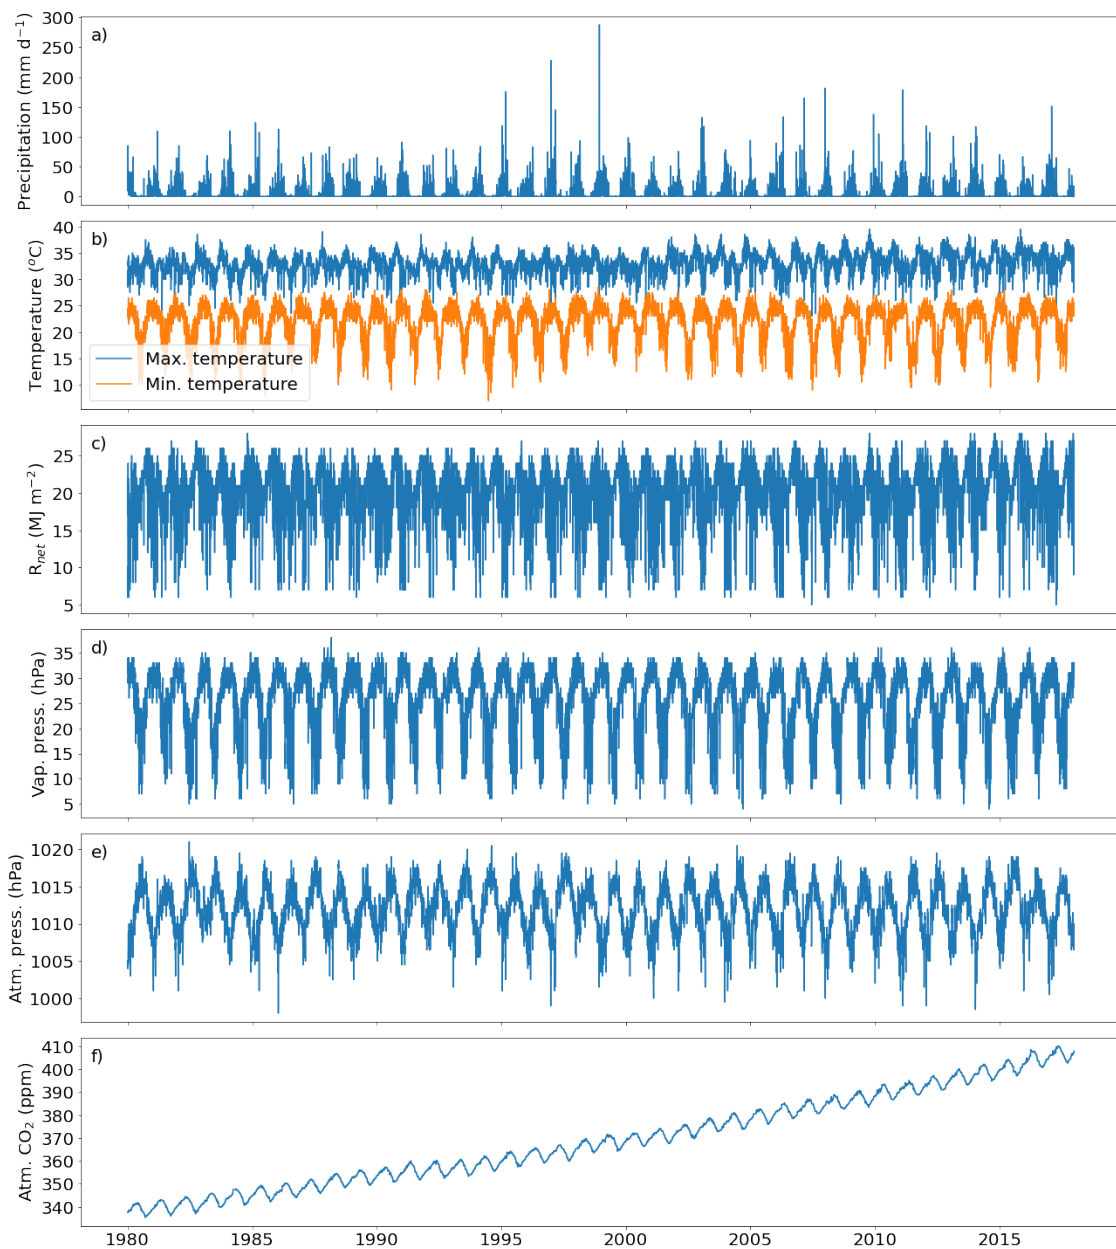

**Figure S3.1** Meteorological timeseries for Howard Springs for a) precipitation, b) maximum and minimum daily temperatures, c) incoming shortwave radiation, d) vapour pressure, e) atmospheric pressure and f) atmospheric CO<sub>2</sub>-levels.

## 1.2 Mean Annual Values

|                | prec.<br>(mm year <sup>-1</sup> ) | pot. evap<br>(mm year <sup>-1</sup> ) | aridity<br>(-) | net radiation<br>(MJ m <sup>-2</sup> year <sup>-1</sup> ) | max.temp<br>(°C) | min.temp<br>(°C) |
|----------------|-----------------------------------|---------------------------------------|----------------|-----------------------------------------------------------|------------------|------------------|
| Howard Springs | 1746.61                           | 1763.28                               | 1.03           | 4392.15                                                   | 27.36            | 37.46            |

**Table S3.1** Mean annual values of precipitation, daily maximum and daily minimum temperatures for the different sites.

## 1.3 Mean monthly values

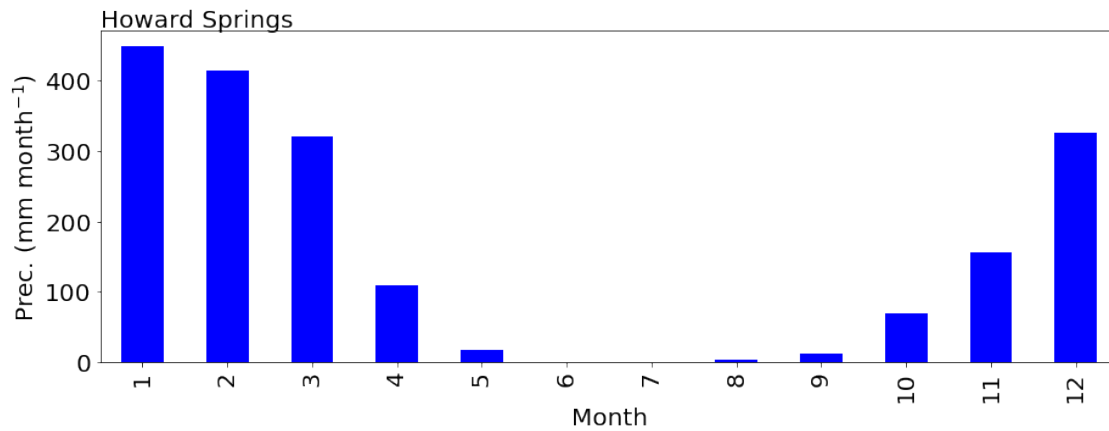

**Figure S3.2** Mean monthly precipitation for a) Howard Springs, b) Adelaide River, c) Daly Uncleared, d) Dry River and e) Sturt Plains.
