# Supplementary material for: Influence of modifications (from AoB2015 to v0.5) in the Vegetation Optimality Model
Source: Copernicus journal article supplement (doi:10.5194/gmd-15-883-2022), 2022-02-01
Supplement: Supplementary file 1 [file gmd-15-883-2022-supplement.zip › S5_sens_rootpar.pdf]

# Supplement S5

December 15, 2021

# 1 Sensitivity of root parameters

## 1.1 Root parameter $i\_rootrad$

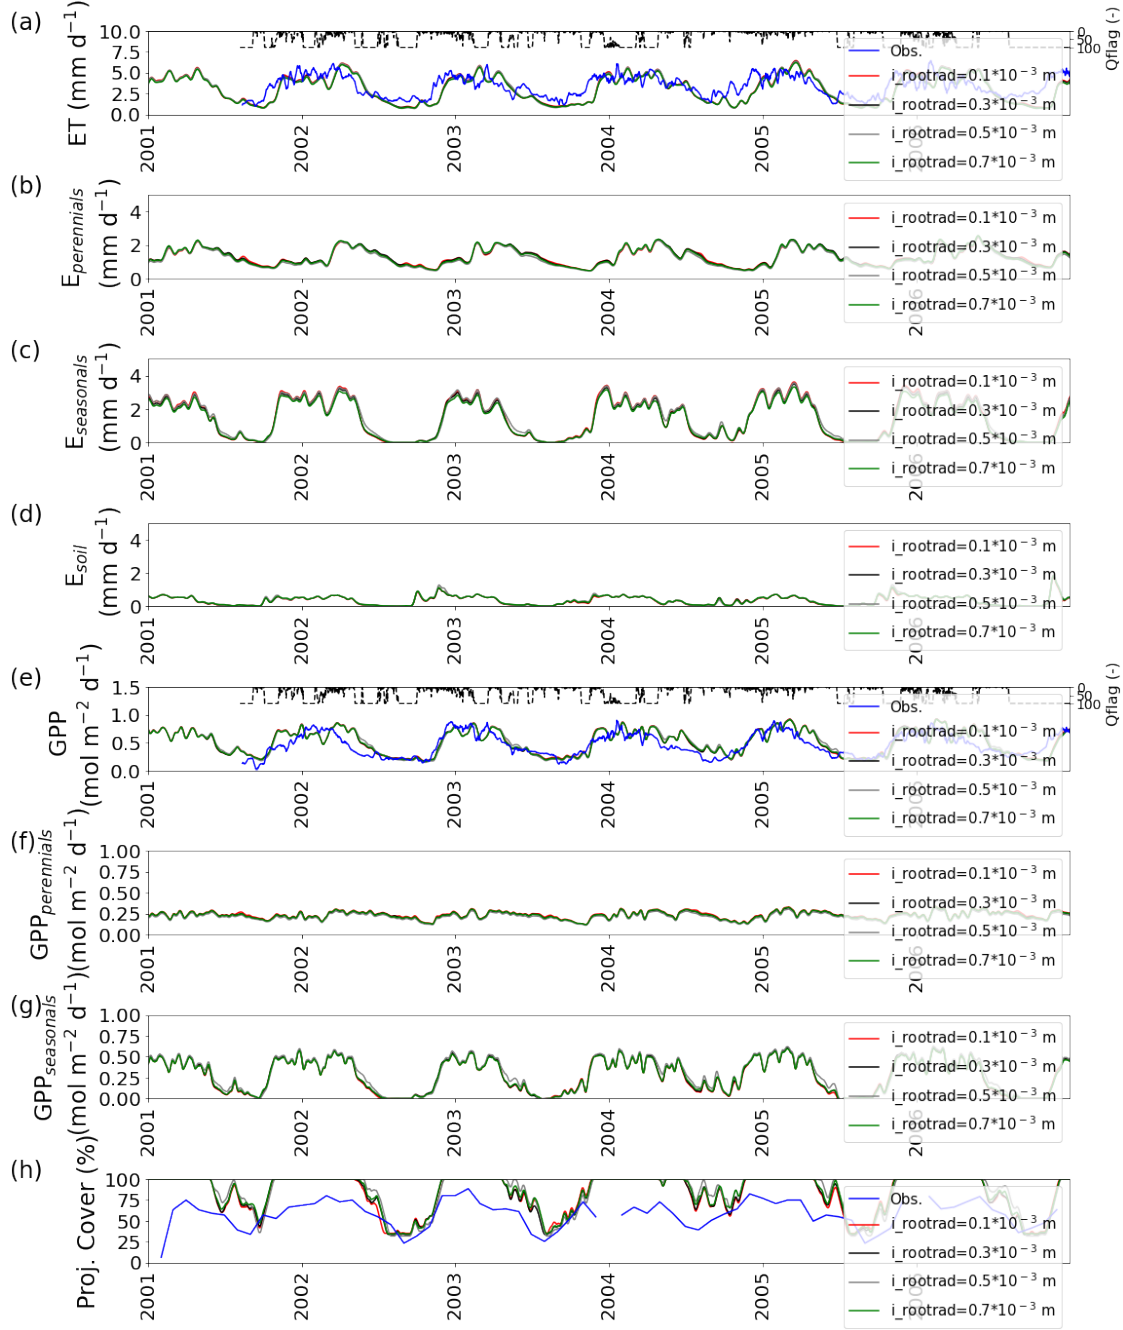

**Figure S5.1.** Comparison for Howard Springs from 2001-2006 (subset from 1980-2017) between the results of the VOM-v0.5 for different values of the parameter  $i\_rootrad$ , with a value of  $0.1 \times 10^{-3}$  m (red),  $0.3 \times 10^{-3}$  m (black),  $0.5 \times 10^{-3}$  m (gray) and  $0.7 \times 10^{-3}$  m (green), for a) ET, b) transpiration perennials (trees), c) transpiration seasonals (grasses), d) soil evaporation, e) GPP,

f) GPP perennials (trees), g) GPP seasonals (grasses), all smoothed with a moving average of 7 days, and h) projective cover. The daily average quality flags of the fluxtower observations are shown in dashed lines with a value of 100 when a day is completely gap-filled and 1 when it is observed.

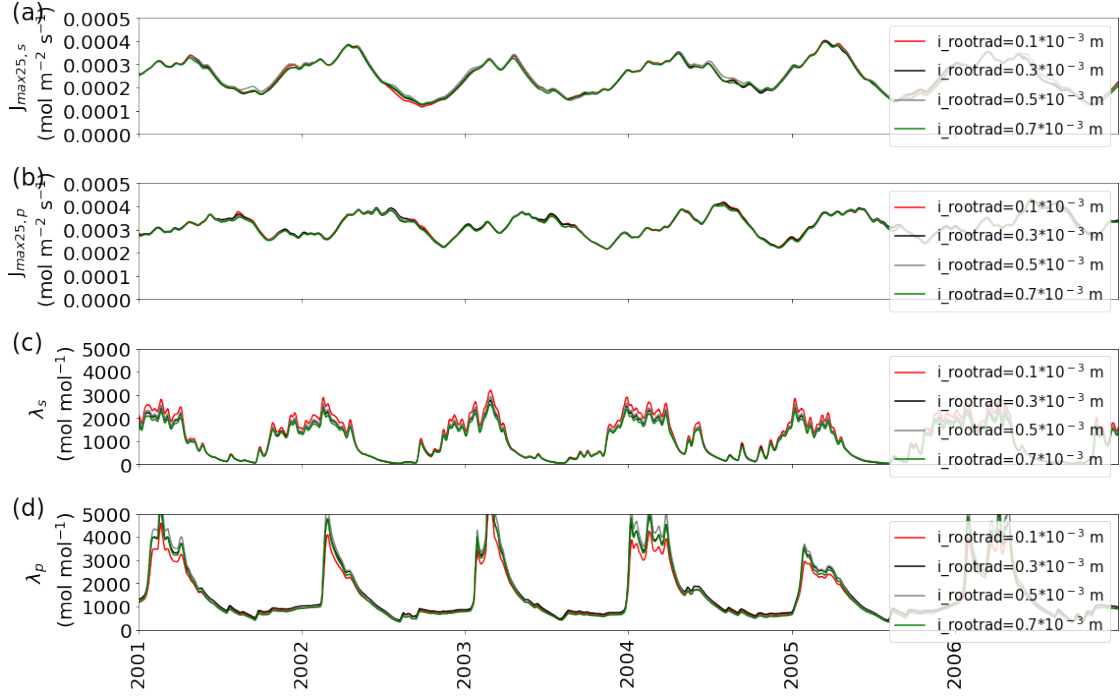

**Figure S5.2.** Comparison for Howard Springs from 2001-2006 (subset from 1980-2017) between the results of the VOM-v0.5 for different values of the parameter  $i\_rootrad$ , with a value of  $0.1 \cdot 10^{-3} \text{ m}$  (red),  $0.3 \cdot 10^{-3} \text{ m}$  (black),  $0.5 \cdot 10^{-3} \text{ m}$  (gray) and  $0.7 \cdot 10^{-3} \text{ m}$  (green) for a) the electron transport capacity at  $25^\circ \text{C}$  for seasonal grasses ( $J_{max25,s}$ ), b) the electron transport capacity at  $25^\circ \text{C}$  for perennials trees ( $J_{max25,p}$ ), c) transpiration seasonals (grasses), d) the daily slope ( $\lambda_s$ ) between assimilation and transpiration of the seasonal grasses, e) the daily slope ( $\lambda_p$ ) between assimilation and transpiration of the perennials (trees).

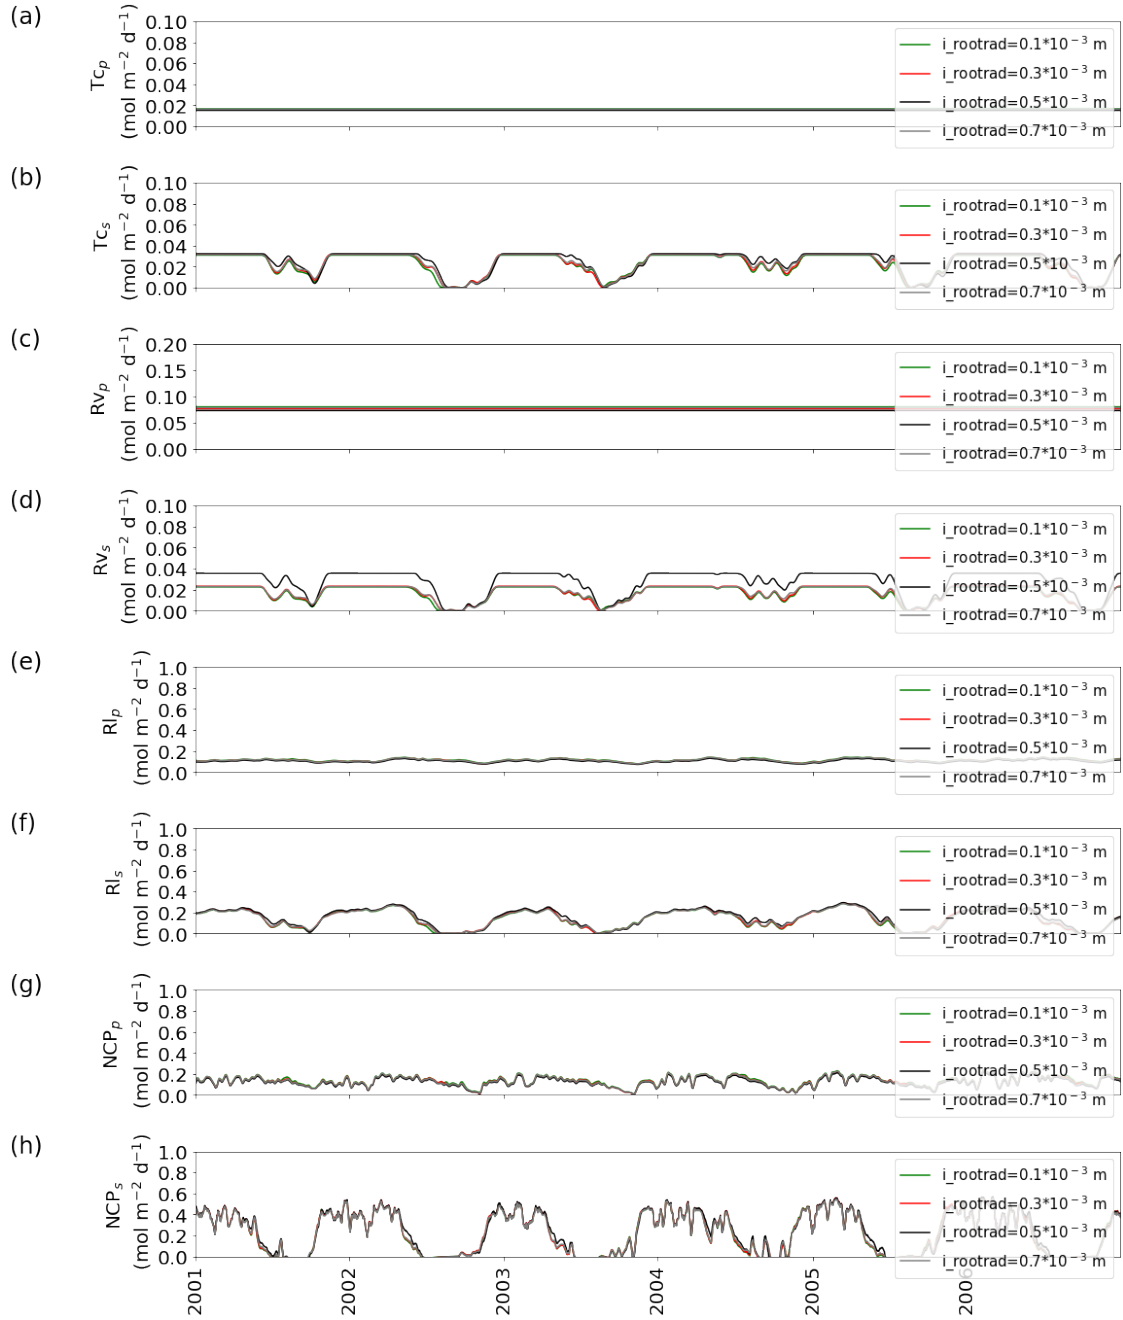

**Figure S5.3.** Comparison for Howard Springs from 2001-2006 (subset from 1980-2017) between the results of the VOM-v0.5 for different values of the parameter  $i\_rootrad$ , with a value of  $0.1 \cdot 10^{-3} \text{ m}$  (red),  $0.3 \cdot 10^{-3} \text{ m}$  (black),  $0.5 \cdot 10^{-3} \text{ m}$  (gray) and  $0.7 \cdot 10^{-3} \text{ m}$  (green) for a) the foliage turnover costs perennial trees ( $Tc_p$ ), b) the foliage turnover costs seasonal grasses ( $Tc_s$ ), c) the water transport costs for perennial trees ( $Rv_p$ ), d) the water transport costs for seasonal grasses ( $Rv_s$ ), e) leaf respiration perennial trees ( $Rl_p$ ), f) leaf respiration seasonal grasses ( $Rl_s$ ), g) root respiration perennial trees ( $Rr_p$ ), h) root respiration seasonal grasses ( $Rr_s$ ), all smoothed with a moving average of 7 days, and h) projective cover. Note that the original results of Schymanski et

al. (2015) are not shown, as these variables were not produced as outputs, but only the reproduced values are shown.

## 1.2 Root parameter $i\_rrootm$

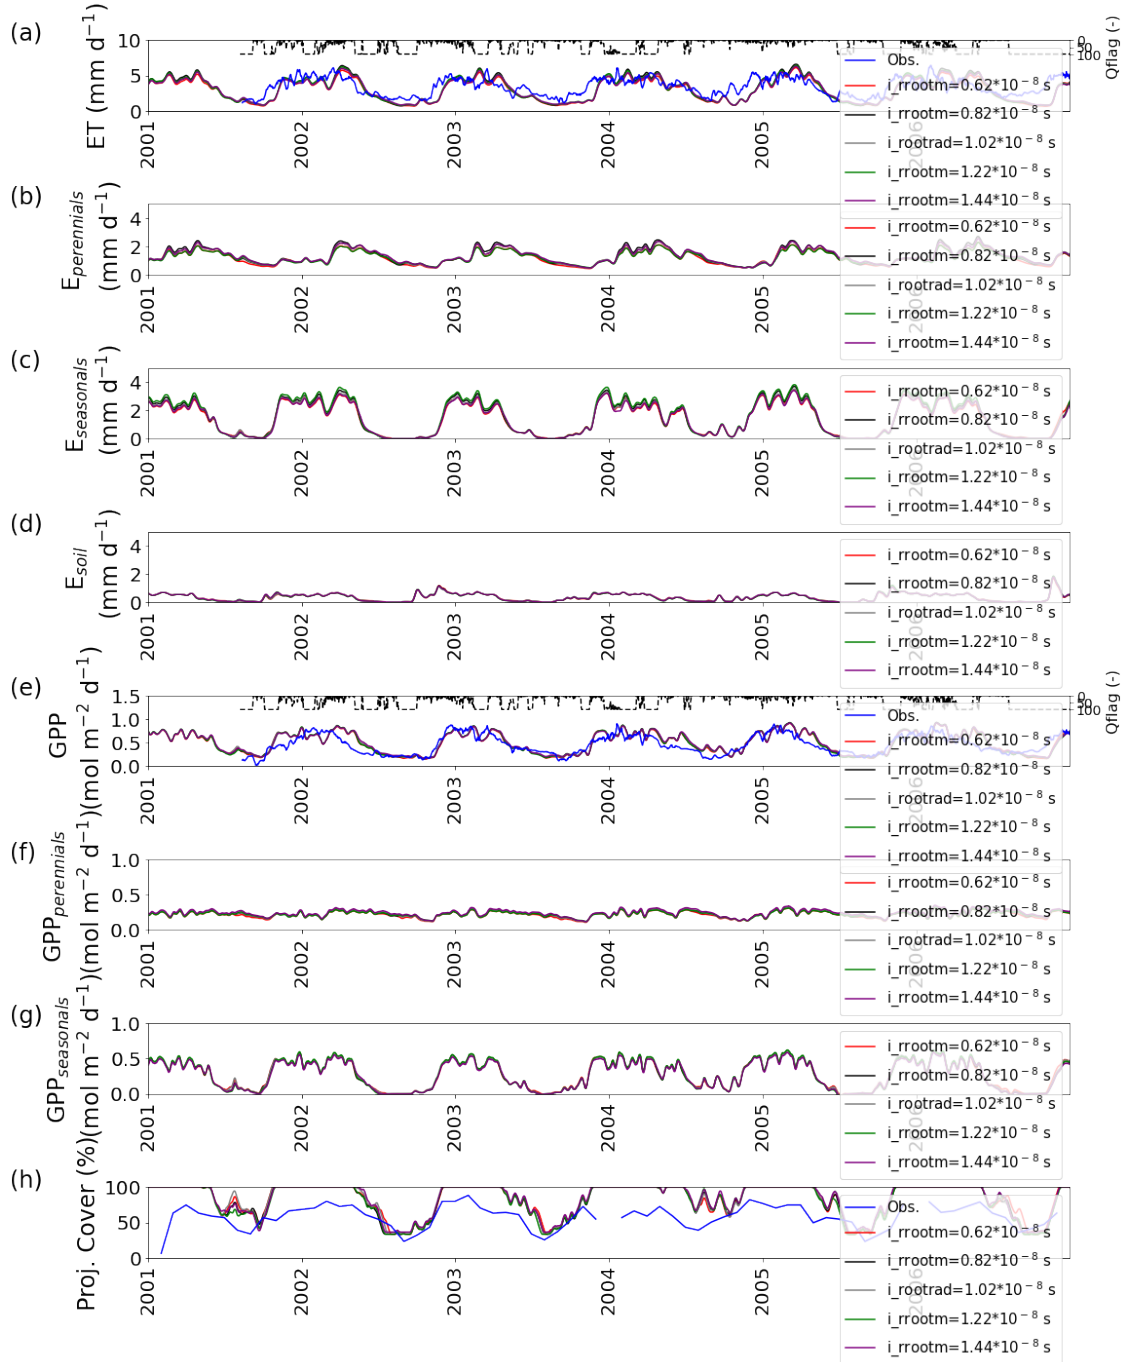

**Figure S5.4.** Comparison for Howard Springs from 2001-2006 (subset from 1980-2017) between the results of the VOM-v0.5 for different values of the parameter  $i\_rrootm$ , with a value of  $0.62 \cdot 10^{-8}$

$s$  (red),  $0.82 \cdot 10^{-8} \text{ s}$  (black),  $1.02 \cdot 10^{-8} \text{ s}$  (gray),  $1.22 \cdot 10^{-8} \text{ s}$  (green) and  $1.44 \cdot 10^{-8} \text{ s}$  (purple), for a) ET, b) transpiration perennials (trees), c) transpiration seasonals (grasses), d) soil evaporation, e) GPP, f) GPP perennials (trees), g) GPP seasonals (grasses), all smoothed with a moving average of 7 days, and h) projective cover. The daily average quality flags of the fluxtower observations are shown in dashed lines with a value of 100 when a day is completely gap-filled and 1 when it is observed.

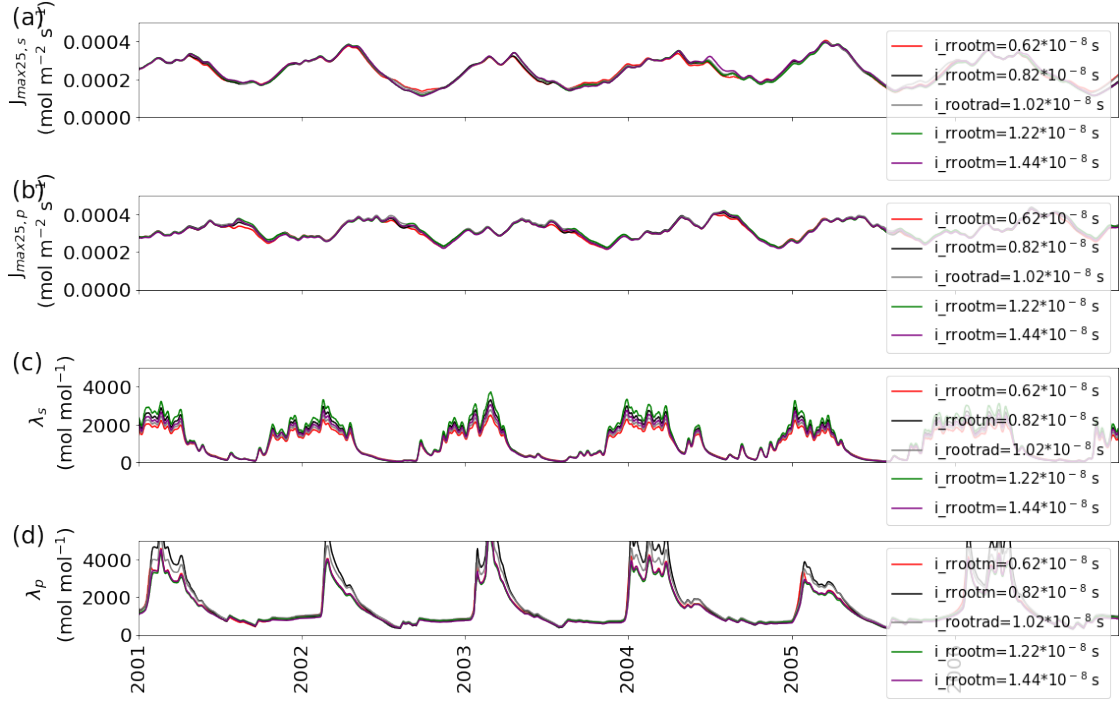

**Figure S5.5.** Comparison for Howard Springs from 2001-2006 (subset from 1980-2017) between the results of the VOM-v0.5 for different values of the parameter  $i\_rootm$ , with a value of  $0.62 \cdot 10^{-8} \text{ s}$  (red),  $0.82 \cdot 10^{-8} \text{ s}$  (black),  $1.02 \cdot 10^{-8} \text{ s}$  (gray),  $1.22 \cdot 10^{-8} \text{ s}$  (green) and  $1.44 \cdot 10^{-8} \text{ s}$  (purple) for a) the electron transport capacity at  $25^\circ \text{C}$  for seasonal grasses ( $J_{max25,s}$ ), b) the electron transport capacity at  $25^\circ \text{C}$  for perennials trees ( $J_{max25,p}$ ), d) transpiration seasonals (grasses), d) the daily slope ( $\lambda_s$ ) between assimilation and transpiration of the seasonal grasses, e) the daily slope ( $\lambda_p$ ) between assimilation and transpiration of the perennials (trees).

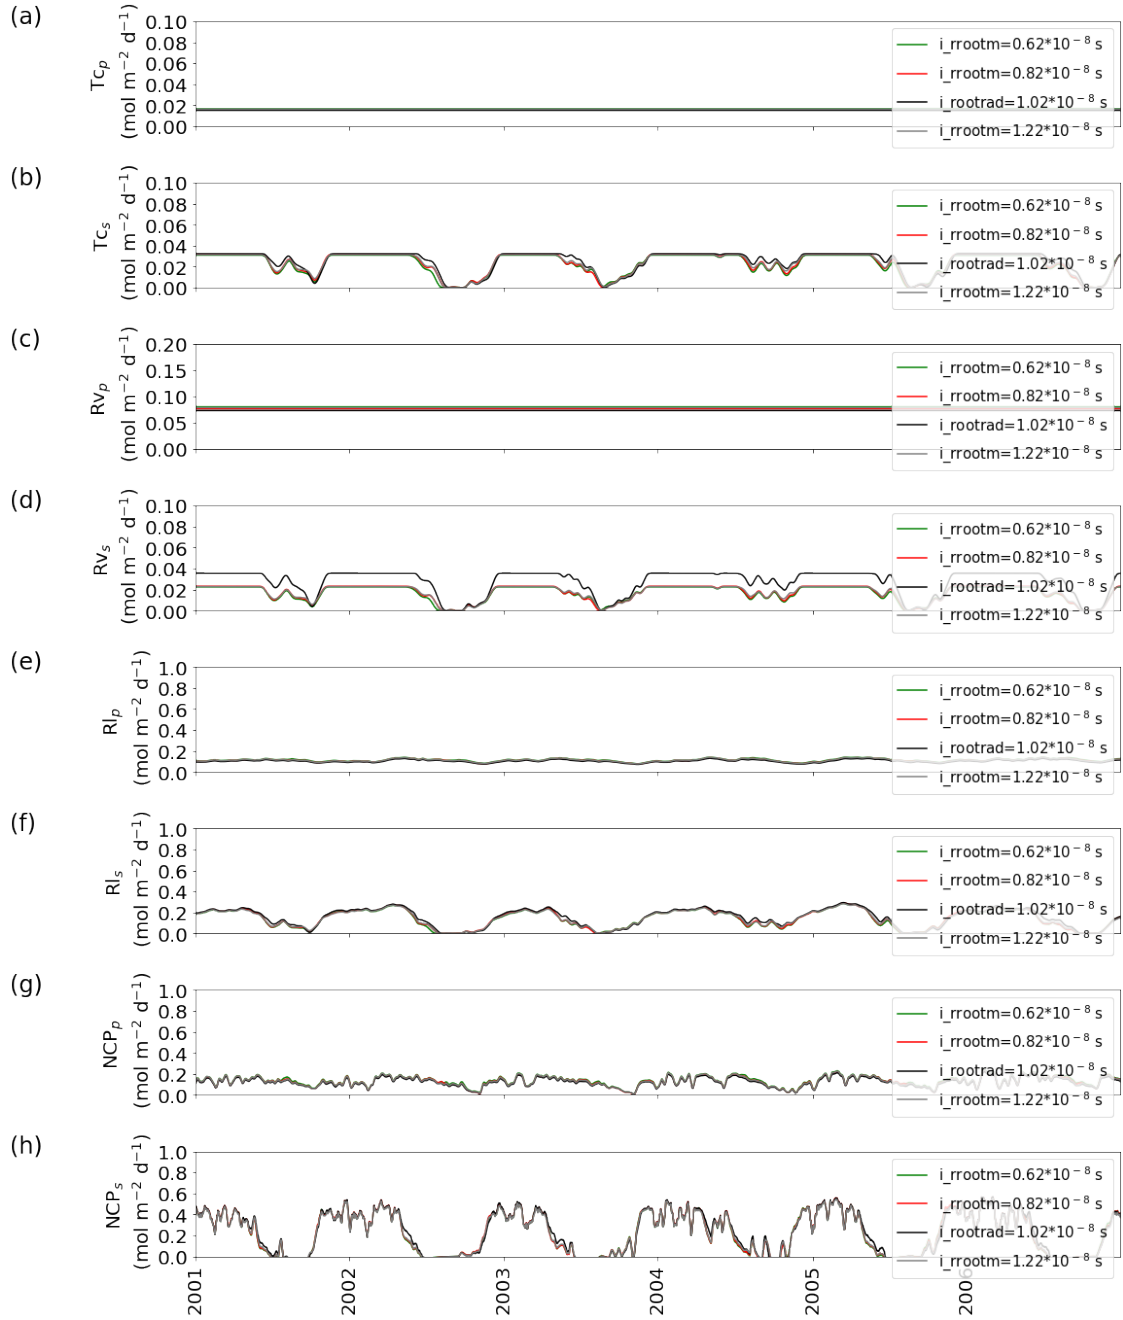

**Figure S5.6.** Comparison for Howard Springs from 2001-2006 (subset from 1980-2017) between the results of the VOM-v0.5 for different values of the parameter  $i\_rootm$ , with a value of  $0.62 \cdot 10^{-8}$  s (red),  $0.82 \cdot 10^{-8}$  s (black),  $1.02 \cdot 10^{-8}$  s (gray),  $1.22 \cdot 10^{-8}$  s (green) and  $1.44 \cdot 10^{-8}$  s (purple) for a) the foliage turnover costs perennial trees ( $Tc_p$ ), b) the foliage turnover costs seasonal grasses ( $Tc_s$ ), c) the water transport costs for perennial trees ( $Rv_p$ ), d) the water transport costs for seasonal grasses ( $Rv_s$ ), e) leaf respiration perennial trees ( $Rl_p$ ), f) leaf respiration seasonal grasses ( $Rl_s$ ), g) root respiration perennial trees ( $Rr_p$ ), h) root respiration seasonal grasses ( $Rr_s$ ), all smoothed with a moving average of 7 days, and h) projective cover. Note that the original results of Schymanski et

*al. (2015) are not shown, as these variables were not produced as outputs, but only the reproduced values are shown.*
